# Supplementary material
Source: PubMed Central journal article supplement (PMC4337532)
Supplement: JVI.03378-14_zjv999090155so1.pdf [file JVI.03378-14_zjv999090155so1.pdf]

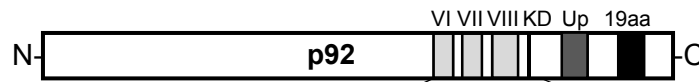

AVEN\_OatChloroticStuntVirus  
 PANI\_CockstoolMildMosaicVirus  
 PANI\_PanicumMosaicVirus  
 MACA\_MaizeChloroticMottleVirus  
 MACA\_FurcraeaNecroticStreakVirus  
 DIAN\_CarnationRingspotVirus  
 DIAN\_RedCloverNecroticMosaicVirus  
 DIAN\_SweetCloverNecroticMosaicVirus  
 AURE\_CucumberLeafSpotVirus  
 AURE\_JohnsongrassChloroticStripeMosaicVirus  
 AURE\_MaizeWhiteLineMosaicVirus  
 AURE\_PothosLatentVirus  
 ANEC\_OliveLatentVirus1  
 ANEC\_OliveMildMosaicVirus  
 ANEC\_TobaccoNecrosisVirusA  
 BNEC\_BeetBlackScorchVirus  
 BNEC\_LeekWhiteStripeVirus  
 BNEC\_TobaccoNecrosisVirusD  
 GALL\_GallinogonMosaicVirus  
 CARM\_AngeloniaFlowerBreakVirus  
 CARM\_CalibrachoaMottleVirus  
 CARM\_CardamineChloroticFleckVirus  
 CARM\_CarnationMottleVirus  
 CARM\_ComepaMottleVirus  
 CARM\_HibiscusChloroticRingspotVirus  
 CARM\_HoneysuckleRingspotVirus  
 CARM\_JapaneseHinsNecroticRingVirus  
 CARM\_MelonNecroticSpotVirus  
 CARM\_NootkaLupineVeinClearingVirus  
 CARM\_PeaStemNecrosisVirus  
 CARM\_PelargoniumFlowerBreakVirus  
 CARM\_SaguaroCactusVirus  
 CARM\_SoybeanYellowMottleMosaicVirus  
 CARM\_TumpCrinkleVirus  
 ZEAV\_MaizeNecroticStreakVirus  
 TOMB\_ArtichokeMottledCrinkleVirus  
 TOMB\_CarnationItalianRingspotVirus  
 TOMB\_CucumberBulgarianVirus  
 TOMB\_CucumberNecrosisVirus  
 TOMB\_CymbidiumRingspotVirus  
 TOMB\_EggplantMottledCrinkleVirus  
 TOMB\_GrapevineAlgerianLatentVirus  
 TOMB\_MoroccanPepperVirus  
 TOMB\_PearLatentVirus  
 TOMB\_PelargoniumNecroticSpotVirus  
 TOMB\_TomatoBushyStuntVirusC

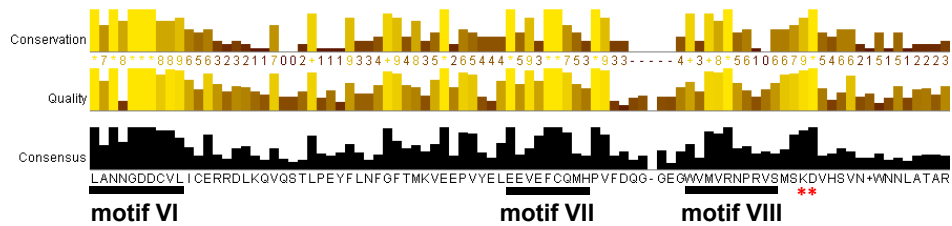

Fig. S1

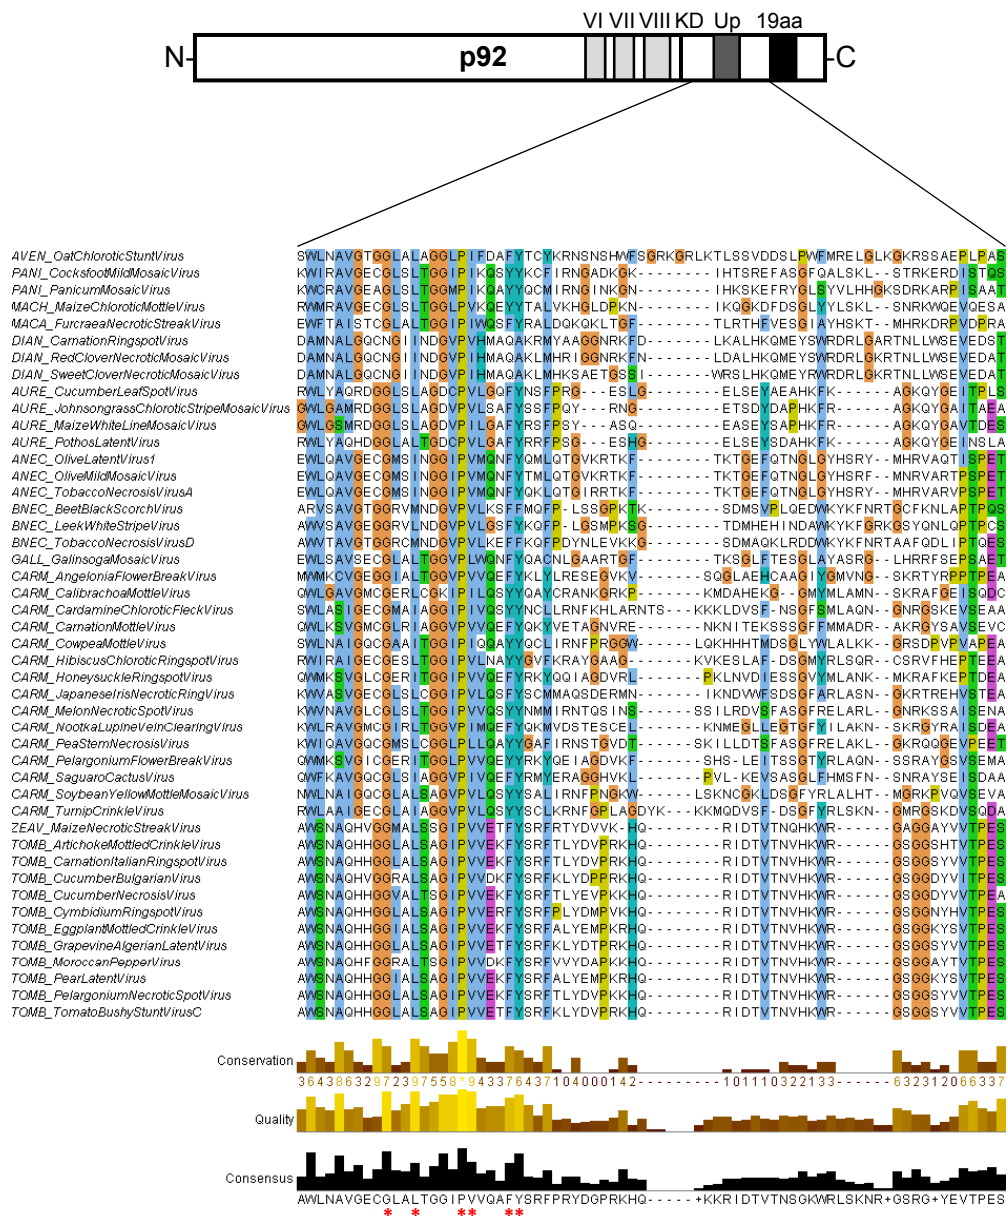

Fig. S1 - continued

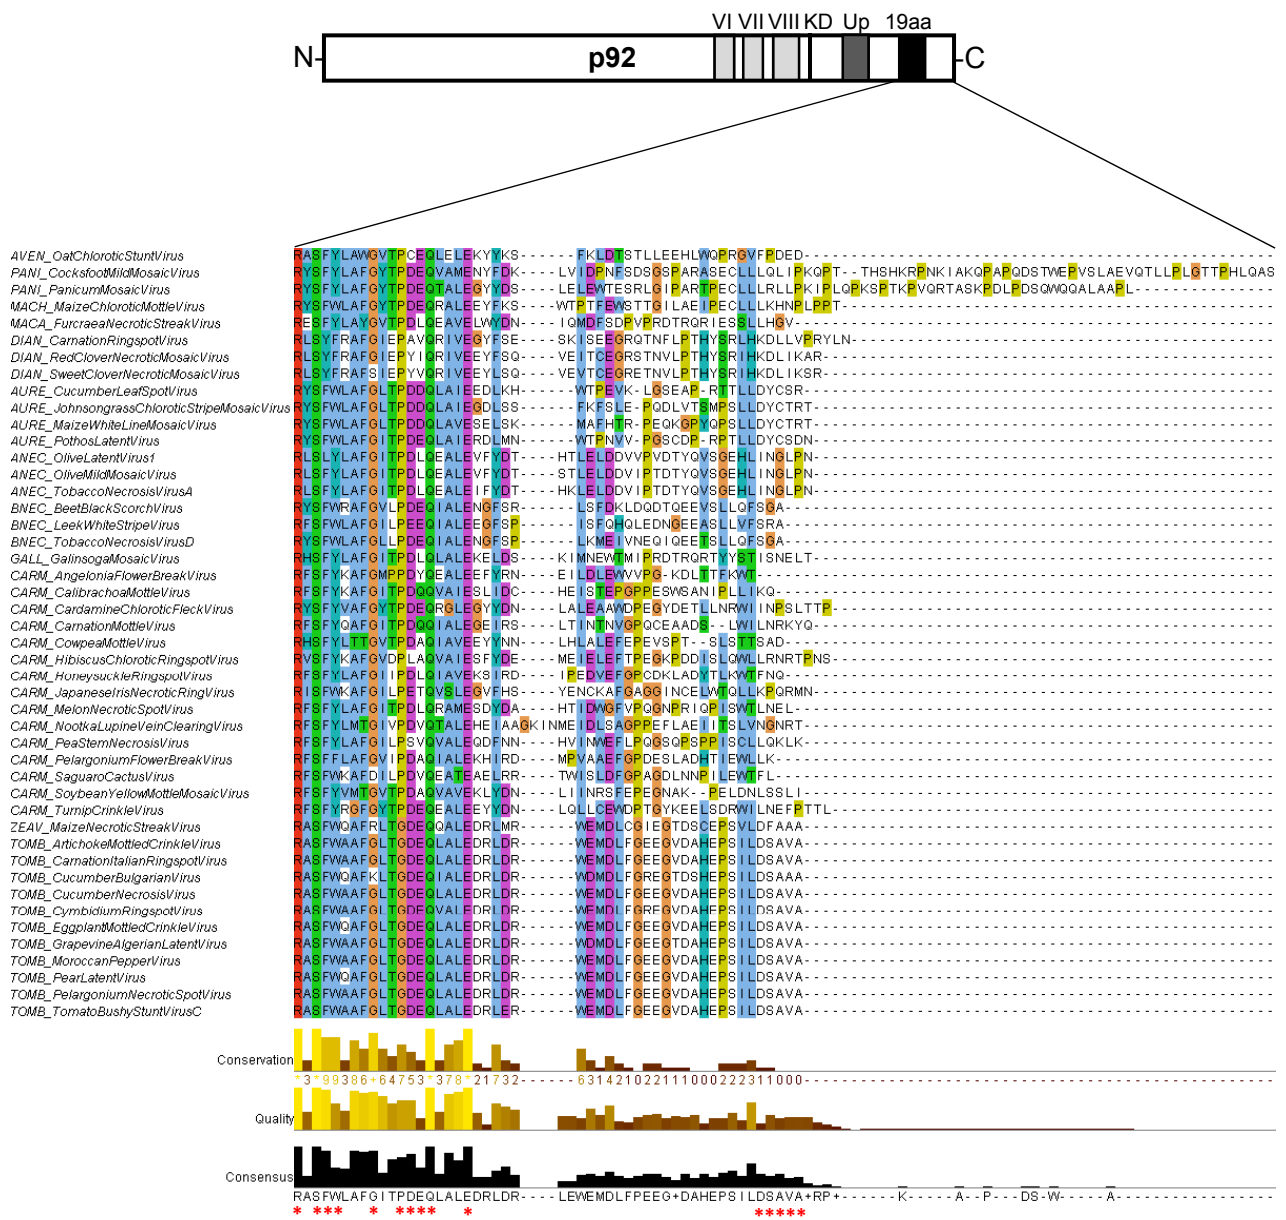

**Fig. S1. Multiple sequence alignment of RdRp sequences from species in Tombusviridae.** Amino acid sequences of RdRps from 46 different species in the Tombusviridae family were aligned using ClustalX. Species names are listed on the left. Genera are abbreviated to four letter codes: TOMB=Tombusvirus; ZEAV=Zeavirus; CARM=Carmovirus; GALL=Gallantivirus; BNEC=Betanecrovirus; ANEC=Alpha-necrovirus; AURE=Aureusvirus; DIAN=Dianthovirus; MACA=Macanavirus; MACH=Machlomovirus; PANI=Panicovirus; AVEN=Avenavirus. Thick black lines below indicate motif VI, VII, and VIII. Conservation, quality and consensus bars are also shown. Conservation is a numerical index reflecting the conservation of chemical properties in the alignment; the number assigned is approximated to the nearest 10%, and is presented as x10-1 % (\*=100%; += two or more residues with similar properties appear together most often at that position). Quality is a score measuring the likelihood of observing that particular alignment of residues. Consensus refers to the residue appearing most often at that position of the alignment; a "+" indicates two or more residues are present most often at that position. Residues are coloured based on their physiochemical properties: blue/cyan=hydrophobic/aromatic; green=polar; magenta=acidic; red=basic; pink=cysteine; orange=glycine; yellow=proline. Conservation bars are coloured according to a gradient based on the score assigned for that residue: brown=low conservation; gold=high conservation. Red asterisks mark conserved residues that were analyzed by mutation. A schematic representation of the TBSV p92 protein is shown above for orientation.

## Accession numbers for Figure S1 (above)

| Genus                      | Species                                    | Accession # (GenBank) |
|----------------------------|--------------------------------------------|-----------------------|
| Avenavirus                 | Oat chlorotic stunt virus                  | NP_619751.1           |
| Panicovirus                | Cocksfoot mild mosaic virus                | YP_002117834.1        |
|                            | Panicum mosaic virus                       | AAC97551.1            |
| Machlomovirus              | Maize chlorotic mottle virus               | ACA57840.1            |
| Macanavirus                | Furcraea necrotic streak virus             | YP_007517174.1        |
| Dianthovirus               | Carnation ringspot virus                   | NP_619711.1           |
|                            | Red clover necrotic mosaic virus           | P22956.2              |
|                            | Sweet clover necrotic mosaic virus         | NP_620674.2           |
| Aureusvirus                | Cucumber leaf spot virus                   | YP_009032639.1        |
|                            | Johnsongrass chlorotic stripe mosaic virus | NP_945128.1           |
|                            | Maize white line mosaic virus              | ABQ65750.1            |
|                            | Pothos latent virus                        | Q9IWA0.1              |
| Alphanecrovirus            | Olive latent virus 1                       | NP_043907.1           |
|                            | Olive mild mosaic virus                    | YP_224015.1           |
|                            | Tobacco necrosis virus A                   | NP_056825.2           |
| Betanecrovirus             | Beet black scorch virus                    | NP_758810.3           |
|                            | Leek white stripe virus                    | NP_044740.1           |
|                            | Tobacco necrosis virus D                   | P27209.3              |
| Gallantivirus              | Galinsoga mosaic virus                     | NP_044732.1           |
| Carmovirus                 | Angelonia flower break virus               | YP_459960.1           |
|                            | Calibrachoa mottle virus                   | YP_008378651.1        |
|                            | Cardamine chlorotic fleck virus            | NP_041884.1           |
|                            | Carnation mottle virus                     | P04518.2              |
|                            | Cowpea mottle virus                        | AAC54603.1            |
|                            | Hibiscus chlorotic ringspot virus          | ABD48708.1            |
|                            | Honeysuckle ringspot virus                 | YP_004191789.1        |
|                            | Japanese iris necrotic ring virus          | NP_038454.1           |
|                            | Melon necrotic spot virus                  | AAM83188.1            |
|                            | Nootka lupine vein-clearing virus          | YP_001039884.1        |
|                            | Pea stem necrosis virus                    | NP_862835.2           |
|                            | Pelargonium flower break virus             | ABB79925.1            |
|                            | Saguaro cactus virus                       | NP_044382.1           |
|                            | Soybean yellow mottle mosaic virus         | ACJ68411.1            |
| Turnip crinkle virus       | P17460.3                                   |                       |
| Tombusvirus                | Artichoke mottled crinkle virus            | NP_039808.1           |
|                            | Carnation Italian ringspot virus           | ACX53291.1            |
|                            | Cucumber Bulgarian virus                   | NP_835253.1           |
|                            | Cucumber necrosis virus                    | P15187.2              |
|                            | Cymbidium ringspot virus                   | P17459.2              |
|                            | Eggplant mottled crinkle virus             | YP_008999611.1        |
|                            | Grapevine Algerian latent virus            | YP_002308429.1        |
|                            | Moroccan pepper virus                      | YP_009037606.1        |
|                            | Pear latent virus                          | AAM49803.1            |
|                            | Pelargonium necrotic spot virus            | NP_945114.1           |
| Tomato bushy stunt virus C | P15962.2                                   |                       |
